# Supplementary material for: Precision pharmacological reversal of strain-specific diet-induced metabolic syndrome in mice informed by epigenetic and transcriptional regulation
Source: PubMed Central journal article supplement (PMC10621921; doi:10.1371/journal.pgen.1010997), 2023-10-23

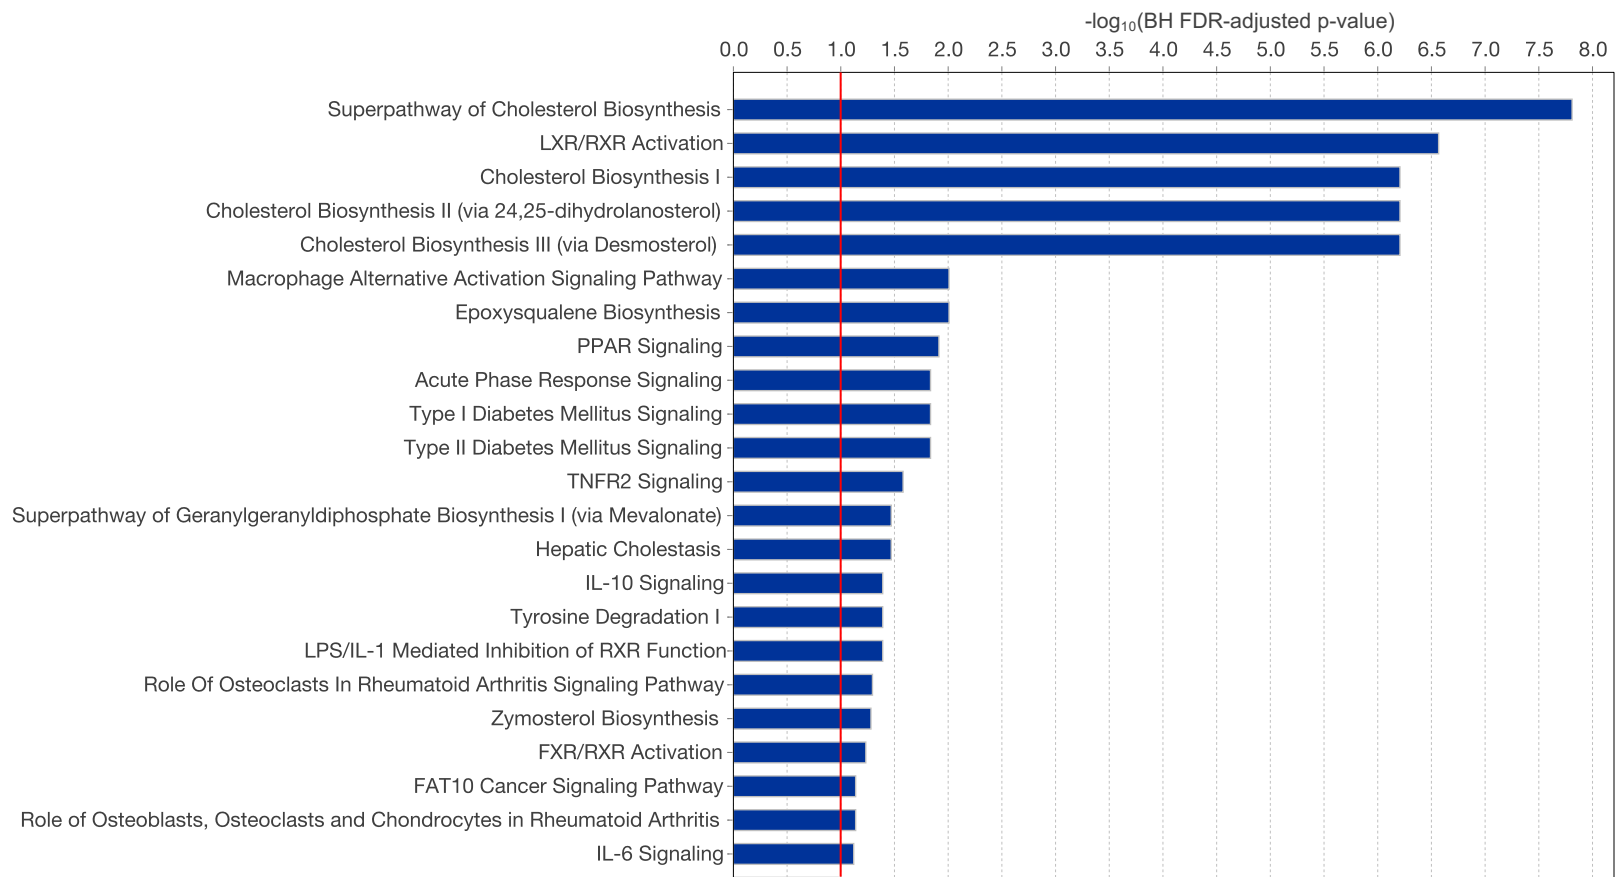

Supplement: pgen.1010997.s009.pdf [file pgen.1010997.s009.pdf]
