# Supplementary material for: Precision pharmacological reversal of strain-specific diet-induced metabolic syndrome in mice informed by epigenetic and transcriptional regulation
Source: PubMed Central journal article supplement (PMC10621921; doi:10.1371/journal.pgen.1010997), 2023-10-23

$-\log_{10}(\text{BH FDR-adjusted p-value})$

0.0 0.1 0.2 0.3 0.4 0.5 0.6 0.7 0.8 0.9 1.0 1.1 1.2 1.3 1.4 1.5 1.6 1.7 1.8 1.9

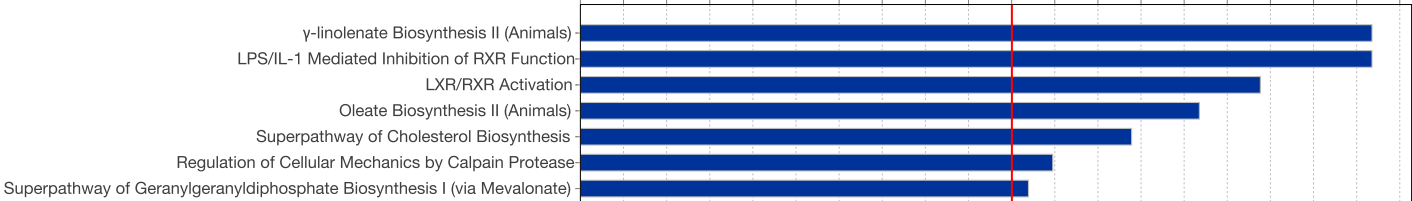

Supplement: pgen.1010997.s010.pdf [file pgen.1010997.s010.pdf]
